# Supplementary material
Source: Springer Nature journal article supplement (https://www.springermedizin.de/resource/supplementary/12891_2010_888_MOESM2_ESM.pdf/9506636)
Supplement: MOESM2 [file 9506636]

| Timeline                       | Experimental intervention                                             | Active control             |
|--------------------------------|-----------------------------------------------------------------------|----------------------------|
|                                | General intake by PT and OT                                           |                            |
| <b>Eligibility assessment</b>  |                                                                       |                            |
| <b>Baseline assessment</b>     |                                                                       |                            |
| <b>Randomisation</b>           |                                                                       |                            |
| <b>Week 1a</b>                 | (a) (b)<br>[a]                                                        | (a) (b) (c)<br>(d) (e) (f) |
| <b>Week 1b</b>                 | (c) (d)<br>[a] [b]                                                    | [f]                        |
| <b>Week 2a</b>                 | (e)<br>[a] [c]                                                        |                            |
| <b>Week 2b</b>                 | (e)<br>[b] [c] [d]                                                    | [f]                        |
| <b>Week 3</b>                  | (f)<br>[c] [d]                                                        | [c] [d]                    |
| <b>Week 4</b>                  | [b] [c] [d]                                                           | [f]                        |
| <b>Week 6</b>                  | [e]                                                                   | [e] [f]                    |
| <b>Measurement of outcomes</b> |                                                                       |                            |
| (a)                            | Group education on the health care program, diaries and expectations. |                            |
| (b)                            | Group education on osteoarthritis, pain and medication.               |                            |
| [a]                            | General exercise program.                                             |                            |
| (c)                            | Group education about physical activity.                              |                            |
| (d)                            | Group education on activity pacing.                                   |                            |
| [b]                            | Recreational activity.                                                |                            |
| [c]                            | Group based monitoring of personal goals.                             |                            |
| (e)                            | Group education on food consumption.                                  |                            |
| [d]                            | Specific exercise program, based upon the PSK-scores.                 |                            |
| (f)                            | Group education on acceptance and helplessness.                       |                            |
| [e]                            | Evaluation and setting goals for the future.                          |                            |
| [f]                            | Monitoring of personal goals via telephone by specialized nurse.      |                            |
